# Supplementary material for: A Stress-Induced Small RNA Modulates Alpha-Rhizobial Cell Cycle Progression
Source: PubMed Central journal article supplement (PMC4414408; doi:10.1371/journal.pgen.1005153), 2015-04-29
Supplement: pgen.1005153.s001.pdf [file pgen.1005153.s001.pdf]

**S1 Table. CopraRNA results of *S. meliloti* target candidates predicted for the SmcC291 family (EcpR1) of homologous sRNAs present in closely related *Rhizobiaceae* species belonging to the genera *Sinorhizobium*, *Agrobacterium*, and *Rhizobium*.**

| Rank | p-value   | Gene ID (Name)                 | Energy [kcal/mol] | Position mRNA |     | Position sRNA |     | Annotation                                                           |
|------|-----------|--------------------------------|-------------------|---------------|-----|---------------|-----|----------------------------------------------------------------------|
|      |           |                                |                   | start         | end | start         | end |                                                                      |
| 1    | 6.20 E-05 | <b>SMc02139 (<i>gerA</i>)</b>  | -17.91            | 92            | 104 | 46            | 58  | cell cycle regulator                                                 |
| 2    | 9.23 E-05 | SMa1538                        | -10.64            | 181           | 189 | 51            | 59  | oxidoreductase                                                       |
| 3    | 9.26 E-05 | <b>SMc01167 (<i>dnaA</i>)</b>  | -14.41            | 261           | 268 | 49            | 56  | <b>chromosomal replication initiator</b>                             |
| 4    | 3.64 E-04 | SMc02702                       | -13.33            | 291           | 298 | 52            | 59  | conserved hypothetical protein                                       |
| 5    | 3.99 E-04 | <b>SMc02369 (<i>pleC</i>)</b>  | -11.01            | 199           | 209 | 48            | 60  | <b>sensor histidine kinase, DivK phosphatase</b>                     |
| 6    | 4.18 E-04 | SMa1896 ( <i>msRA3</i> )       | -17.07            | 238           | 255 | 44            | 63  | methionine sulfoxide reductase A                                     |
| 7    | 4.94 E-04 | SMa0204                        | -20.11            | 42            | 58  | 45            | 62  | sensor histidine kinase                                              |
| 8    | 6.03 E-04 | SMc03957 ( <i>tolR</i> )       | -15.43            | 235           | 243 | 48            | 56  | transport transmembrane protein                                      |
| 9    | 6.93 E-04 | SMb20887                       | -13.12            | 159           | 165 | 50            | 56  | hypothetical transmembrane protein                                   |
| 10   | 7.30 E-04 | SMc01441 ( <i>hflK</i> )       | -12.12            | 223           | 229 | 50            | 56  | membrane bound protease                                              |
| 11   | 0.0010    | SMc00416                       | -14.40            | 8             | 20  | 48            | 59  | putative tetrapyrrole methylase                                      |
| 13   | 0.0012    | SMc04210                       | -9.67             | 104           | 114 | 49            | 59  | conserved hypothetical protein                                       |
| 14   | 0.0015    | SMc01278 ( <i>sugE</i> )       | -11.61            | 17            | 31  | 99            | 111 | chaperone-like protein                                               |
| 15   | 0.0015    | SMa0503                        | -7.97             | 198           | 206 | 52            | 61  | ABC transporter permease                                             |
| 16   | 0.0016    | SMc02364 ( <i>cycL</i> )       | -16.96            | 146           | 157 | 49            | 59  | cytochrome C-type biogenesis transmembrane protein                   |
| 17   | 0.0016    | SMc02906                       | -10.58            | 6             | 13  | 49            | 56  | conserved hypothetical protein                                       |
| 18   | 0.0017    | SMc00612                       | -14.10            | 173           | 184 | 44            | 56  | hypothetical protein signal peptide                                  |
| 19   | 0.0019    | SMb20719                       | -11.77            | 183           | 206 | 42            | 64  | sugar uptake ABC transporter permease                                |
| 20   | 0.0021    | <b>SMc04296 (<i>ftsZ2</i>)</b> | -11.29            | 268           | 274 | 50            | 56  | <b>cell division protein</b>                                         |
| 22   | 0.0024    | SMc00088                       | -12.3             | 215           | 227 | 48            | 59  | 2-component receiver domain protein                                  |
| 23   | 0.0025    | SMc04446 ( <i>chvG</i> )       | -7.29             | 230           | 250 | 39            | 60  | signal transduction histidine kinase                                 |
| 24   | 0.0025    | SMb20207 ( <i>pqqD</i> )       | -15.53            | 141           | 182 | 88            | 134 | pyrroloquinoline quinone synthesis protein D                         |
| 25   | 0.0026    | SMc01919                       | -15.13            | 72            | 81  | 50            | 59  | hypothetical transmembrane protein                                   |
| 26   | 0.0026    | SMb20499                       | -13.57            | 265           | 271 | 50            | 56  | glycerol-3-phosphate dehydrogenase                                   |
| 28   | 0.0027    | SMb20329 ( <i>thuA</i> )       | -9.89             | 212           | 220 | 102           | 110 | trehalose catabolism protein                                         |
| 29   | 0.0027    | SMb20497 ( <i>lyx</i> )        | -14.44            | 291           | 298 | 49            | 56  | L-xylulose kinase                                                    |
| 30   | 0.0029    | SMa1853                        | -14.94            | 102           | 112 | 50            | 60  | conserved hypothetical protein                                       |
| 31   | 0.0032    | <b>SMc00654 (<i>ctrA</i>)</b>  | -13.28            | 180           | 187 | 49            | 56  | <b>cell cycle transcriptional regulator</b>                          |
| 32   | 0.0033    | SMc03161                       | -12.24            | 262           | 269 | 49            | 56  | oxidoreductase                                                       |
| 33   | 0.0037    | SMc00613 ( <i>acvB</i> )       | -10.36            | 247           | 257 | 52            | 63  | conserved hypothetical protein                                       |
| 34   | 0.0040    | SMc02687                       | -7.15             | 90            | 96  | 50            | 56  | conserved hypothetical protein                                       |
| 35   | 0.0043    | SMc03150                       | -11.22            | 105           | 147 | 87            | 118 | transcriptional regulator LuxR family                                |
| 36   | 0.0044    | SMc01742                       | -12.84            | 280           | 286 | 50            | 56  | conserved hypothetical protein                                       |
| 37   | 0.0050    | SMb20081                       | -15.16            | 225           | 236 | 45            | 56  | conserved hypothetical protein                                       |
| 38   | 0.0053    | <b>SMb21523 (<i>minD</i>)</b>  | -16.68            | 139           | 151 | 49            | 60  | <b>putative cell division inhibitor</b>                              |
| 39   | 0.0053    | SMc00012 ( <i>ctaG</i> )       | -13.51            | 203           | 209 | 48            | 54  | cytochrome C oxidase assembly protein                                |
| 40   | 0.0054    | SMc02158                       | -12.01            | 240           | 249 | 48            | 56  | acyltransferase                                                      |
| 41   | 0.0055    | SMc01223 ( <i>ltp3</i> )       | -14.15            | 99            | 110 | 49            | 59  | leucine-responsive regulatory protein. AsnC family                   |
| 43   | 0.0056    | SMc00582                       | -9.40             | 201           | 207 | 50            | 56  | conserved hypothetical protein                                       |
| 44   | 0.0058    | SMa5025                        | -15.25            | 275           | 295 | 44            | 62  | conserved hypothetical protein                                       |
| 46   | 0.0060    | SMc04005 ( <i>pykA</i> )       | -12.55            | 3             | 18  | 48            | 60  | pyruvate kinase                                                      |
| 47   | 0.0060    | SMb20712 ( <i>mocB</i> )       | -8.68             | 167           | 175 | 52            | 60  | rhizopine uptake ABC transporter substrate-binding protein precursor |
| 48   | 0.0060    | SMb21089                       | -11.39            | 165           | 187 | 102           | 121 | carnitine dehydratase                                                |
| 49   | 0.0061    | SMb20877                       | -12.67            | 223           | 229 | 50            | 56  | oxidoreductase, possibly D-amino acid oxidase                        |
| 50   | 0.0061    | SMc02039                       | -11.51            | 8             | 33  | 39            | 69  | oxidoreductase, short-chain dehydrogenase                            |
| 51   | 0.0061    | SMc01638                       | -9.88             | 237           | 259 | 42            | 62  | bifunctional 3-hydroxyacyl-CoA dehydrogenase/thioesterase            |
| 52   | 0.0062    | SMc02778                       | -12.52            | 286           | 295 | 49            | 58  | hydroxyacid aldolase                                                 |
| 53   | 0.0064    | SMb21078                       | -11.17            | 184           | 191 | 49            | 56  | glycosyltransferase                                                  |
| 54   | 0.0064    | SMa0303                        | -12.34            | 276           | 282 | 50            | 56  | LysR family transcriptional regulator                                |
| 56   | 0.0065    | <b>SMc01874 (<i>ftsZ1</i>)</b> | -12.71            | 271           | 277 | 50            | 56  | <b>cell division protein</b>                                         |
| 57   | 0.0066    | SMb20633                       | -9.68             | 43            | 49  | 49            | 55  | sugar uptake ABC transporter permease                                |
| 58   | 0.0067    | SMc02525 ( <i>fdsB</i> )       | -14.34            | 228           | 237 | 50            | 59  | NAD-dependent formate dehydrogenase subunit beta                     |
| 59   | 0.0067    | SMc02520 ( <i>glpD</i> )       | -11.42            | 238           | 244 | 50            | 56  | glycerol-3-phosphate dehydrogenase                                   |
| 60   | 0.0068    | SMc02875                       | -14.01            | 225           | 236 | 49            | 59  | conserved hypothetical protein                                       |
| 61   | 0.0070    | SMc04058                       | -14.50            | 63            | 70  | 52            | 59  | conserved hypothetical protein                                       |
| 62   | 0.0071    | SMa0834 ( <i>fdxB</i> )        | -8.82             | 28            | 35  | 53            | 60  | FdxB ferredoxin III                                                  |
| 63   | 0.0072    | SMc03798 ( <i>galM</i> )       | -8.64             | 152           | 158 | 49            | 55  | aldose 1-epimerase                                                   |
| 64   | 0.0074    | SMc04055                       | -11.77            | 236           | 266 | 42            | 62  | transcriptional regulator LysR family                                |
| 65   | 0.0076    | SMc02363 ( <i>cycK</i> )       | -10.84            | 280           | 289 | 51            | 60  | cytochrome C-type biogenesis transmembrane protein                   |
| 66   | 0.0076    | SMa1521                        | -13.28            | 133           | 140 | 49            | 56  | conserved hypothetical protein                                       |
| 67   | 0.0079    | SMc00175                       | -15.12            | 230           | 242 | 48            | 60  | ABC transporter ATP-binding protein                                  |

|    |        |                                |        |     |     |     |     |                                                    |
|----|--------|--------------------------------|--------|-----|-----|-----|-----|----------------------------------------------------|
| 68 | 0.0079 | <b>SMb20986 (<i>narB</i>)</b>  | -14.13 | 187 | 194 | 49  | 56  | nitrate reductase large subunit protein            |
| 69 | 0.0079 | <b>SMa1613</b>                 | -9.19  | 286 | 295 | 55  | 64  | Insertion sequence ISRM29                          |
| 70 | 0.0081 | <b>SMb20116</b>                | -14.31 | 138 | 149 | 49  | 59  | conserved hypothetical protein                     |
| 71 | 0.0082 | <b>SMb20328 (<i>thuK</i>)</b>  | -14.45 | 146 | 153 | 49  | 56  | trehalosemaltose transporter ATP-binding protein   |
| 73 | 0.0083 | <b>SMc01024 (<i>secG</i>)</b>  | -10.78 | 280 | 286 | 50  | 56  | preprotein translocase subunit SecG                |
| 74 | 0.0085 | <b>SMc02370 (<i>pepN</i>)</b>  | -12.09 | 264 | 279 | 44  | 61  | aminopeptidase N                                   |
| 75 | 0.0085 | <b>SMc00760 (<i>recA</i>)</b>  | -11.01 | 152 | 159 | 50  | 57  | DNA strand exchange and recombination protein      |
| 76 | 0.0085 | <b>SMc03204 (<i>lpdA3</i>)</b> | -7.62  | 121 | 132 | 50  | 61  | dihydroliipoamide dehydrogenase                    |
| 77 | 0.0090 | <b>SMc02368 (<i>glnE</i>)</b>  | -11.92 | 237 | 246 | 50  | 59  | glutamate-ammonia-ligase adenylyltransferase       |
| 78 | 0.0092 | <b>SMb20300 (<i>cyaF7</i>)</b> | -17.00 | 116 | 132 | 48  | 64  | adenylate cyclase                                  |
| 79 | 0.0093 | <b>SMb20523</b>                | -8.46  | 117 | 123 | 52  | 58  | diguanylate cyclase signal peptide                 |
| 80 | 0.0094 | <b>SMc02022</b>                | -12.32 | 277 | 284 | 49  | 56  | transcriptional regulator LacI family              |
| 81 | 0.0094 | <b>SMb21228</b>                | -11.29 | 199 | 207 | 52  | 60  | nucleotide sugar epimerase dehydratase             |
| 82 | 0.0094 | <b>SMa0664</b>                 | -11.46 | 192 | 200 | 48  | 56  | conserved hypothetical protein                     |
| 83 | 0.0095 | <b>SMc03111 (<i>pmi</i>)</b>   | -9.99  | 289 | 296 | 102 | 109 | mannose-6-phosphate isomerase                      |
| 84 | 0.0095 | <b>SMb20500</b>                | -11.25 | 290 | 298 | 50  | 59  | aldoketo reductase                                 |
| 85 | 0.0096 | <b>SMb20604</b>                | -13.15 | 39  | 45  | 50  | 56  | branched-chain amino acid ABC transporter permease |
| 86 | 0.0096 | <b>SMc00833 (<i>glcE</i>)</b>  | -10.78 | 258 | 264 | 50  | 56  | glycolate oxidase subunit protein                  |
| 87 | 0.0097 | <b>SMc01725</b>                | -8.39  | 27  | 36  | 48  | 57  | conserved hypothetical transmembrane protein       |
| 88 | 0.0098 | <b>SMc02976</b>                | -14.57 | 45  | 54  | 49  | 58  | transcriptional regulator MarR family              |

Cell cycle related candidates used for the enrichment analysis are denoted in bold and experimentally confirmed targets are underlined.
