# Supplementary material for: A Stress-Induced Small RNA Modulates Alpha-Rhizobial Cell Cycle Progression
Source: PubMed Central journal article supplement (PMC4414408; doi:10.1371/journal.pgen.1005153), 2015-04-29
Supplement: pgen.1005153.s002.pdf [file pgen.1005153.s002.pdf]

**S2 Table. Genes and 5'-/3'-UTRs differentially expressed 15 minutes after induction of EcpR1 overproduction (P-value  $\leq$  0.05 and M  $\geq$  0.7 or  $\leq$  -0.7).**

| Gene ID                                       | Name         | Description                                         | M value | Region |
|-----------------------------------------------|--------------|-----------------------------------------------------|---------|--------|
| <i>Metabolism (3)</i>                         |              |                                                     |         |        |
| SMc03253                                      |              | L-proline cis-4-hydroxylase                         | -2.98   | 5'UTR  |
| SMc02896                                      | <i>ilvE1</i> | Probable branched-chain amino acid aminotransferase | -1.12   | 3'UTR  |
| SMA1243                                       | <i>azu1</i>  | Azu1 pseudoazurin                                   | -2.10   | CDS    |
| <i>Information storage and processing (1)</i> |              |                                                     |         |        |
| SMc00323                                      |              | Probable 30S Ribosomal protein S15                  | -0.72   | CDS    |
| <i>Poorly characterized (2)</i>               |              |                                                     |         |        |
| SMb20848                                      |              | Conserved hypothetical membrane protein             | -1.94   | CDS    |
| SMc00769                                      |              | Conserved hypothetical protein                      | -1.28   | CDS    |

Genes were classified according to COG (cluster of orthologous groups).

The M value represents the  $\log_2$  ratio of transcript levels.
