# Supplementary material for: A Stress-Induced Small RNA Modulates Alpha-Rhizobial Cell Cycle Progression
Source: PubMed Central journal article supplement (PMC4414408; doi:10.1371/journal.pgen.1005153), 2015-04-29
Supplement: pgen.1005153.s003.pdf [file pgen.1005153.s003.pdf]

**S3 Table. Genes and 5'-/3'-UTRs displaying decreased expression 1 hour after induction of EcpR1 overproduction (P-value  $\leq 0.05$  and M  $\geq 0.7$  or  $\leq -0.7$ ).**

| Gene ID                                       | Name         | Description                                            | M value | Region |
|-----------------------------------------------|--------------|--------------------------------------------------------|---------|--------|
| <i>Cellular processes and signaling (3)</i>   |              |                                                        |         |        |
| SMc00168                                      | <i>sinR</i>  | Qs system, AHL autoinducer-binding, <i>luxR</i> family | -1.07   | 5'UTR  |
| SMc00023                                      |              | Putative DSBA oxidoreductase                           | -0.92   | CDS    |
| SMc01335                                      | <i>amiC</i>  | Probable N-acetylmuramoyl-L-alanine amidase            | -0.77   | 5'UTR  |
| <i>Metabolism (12)</i>                        |              |                                                        |         |        |
| S Mb20820                                     | <i>mocF</i>  | Putative ferredoxin reductase                          | -3.21   | 5'UTR  |
| S Mb20327                                     | <i>thuG</i>  | Probable trehalosemaltose transporter permease         | -1.88   | CDS    |
| S Ma0101                                      |              | Amidohydrolase                                         | -1.59   | CDS    |
| S Mb20817                                     |              | Putative transcriptional regulator, LacI family        | -1.10   | 5'UTR  |
| SMc03201                                      | <i>bkdAa</i> | Probable 2-oxoisovalerate dehydrogenase                | -0.97   | CDS    |
| SMc02503                                      |              | Putative saccharopine dehydrogenase                    | -0.96   | CDS    |
| S Mb20326                                     | <i>thuF</i>  | Probable trehalosemaltose transporter permease         | -0.95   | CDS    |
| S Mb20819                                     | <i>mocE</i>  | Putative ferredoxin of the Rieske type protein         | -0.91   | CDS    |
| SMc03132                                      | <i>ordL3</i> | Oxidoreductase                                         | -0.88   | CDS    |
| SMc03253                                      |              | L-proline cis-4-hydroxylase                            | -0.84   | 5'UTR  |
| SMc03061                                      | <i>aglE</i>  | Alpha-glucosides periplasmic ABC transporter           | -0.73   | CDS    |
| S Mb21121                                     | <i>ivdH</i>  | Putative isovaleryl-CoA dehydrogenase                  | -0.71   | CDS    |
| <i>Information storage and processing (1)</i> |              |                                                        |         |        |
| SMc01336                                      | <i>rne</i>   | Ribonuclease E                                         | -0.77   | 5'UTR  |
| <i>Poorly characterized (4)</i>               |              |                                                        |         |        |
| SMc03107                                      |              | Conserved hypothetical protein                         | -1.26   | CDS    |
| S Mb20848                                     |              | Conserved hypothetical membrane protein                | -1.17   | CDS    |
| S Ma1262                                      |              | Conserved hypothetical pirin-like protein              | -1.04   | CDS    |
| SMc01449                                      |              | Conserved hypothetical protein                         | -0.79   | CDS    |

The M value represents the  $\log_2$  ratio of transcript levels.
