# Supplementary material for: A Stress-Induced Small RNA Modulates Alpha-Rhizobial Cell Cycle Progression
Source: PubMed Central journal article supplement (PMC4414408; doi:10.1371/journal.pgen.1005153), 2015-04-29
Supplement: pgen.1005153.s004.pdf [file pgen.1005153.s004.pdf]

**S4 Table. Genes and 5'-/3'-UTRs displaying increased expression 1 hour after induction of EcpR1 overproduction (P-value  $\leq 0.05$  and M  $\geq 0.7$  or  $\leq -0.7$ ).**

| Gene ID                                        | Name         | Description                                         | M value | Region |
|------------------------------------------------|--------------|-----------------------------------------------------|---------|--------|
| <i>Cellular processes and signaling (2)</i>    |              |                                                     |         |        |
| SMc03005                                       |              | Conserved hypothetical protein                      | 1.69    | CDS    |
| SMc02833                                       | <i>mepA</i>  | Putative murein endopeptidase transmembrane         | 1.58    | 5'UTR  |
| <i>Metabolism (13)</i>                         |              |                                                     |         |        |
| SMa0203                                        |              | Putative ABC transporter                            | 2.59    | CDS    |
| SMB20712                                       | <i>ibpA</i>  | Putative myo-inositol ABC transporter               | 2.14    | 5'UTR  |
| SMa0077                                        |              | Hypothetical protein                                | 1.71    | CDS    |
| SMB20712                                       | <i>mocB</i>  | Putative rhizopine uptake ABC transporter precursor | 1.40    | CDS    |
| SMc00432                                       | <i>iolB</i>  | Putative myo-inositol catabolism protein            | 1.27    | CDS    |
| SMB21338                                       |              | Putative molybdopterin binding protein              | 1.12    | CDS    |
| SMc00549                                       |              | Hypothetical protein                                | 1.10    | CDS    |
| SMB20072                                       |              | ABC transporter, periplasmic solute-binding         | 0.92    | 5'UTR  |
| SMc02520                                       | <i>glpD</i>  | Putative glycerol-3-phosphate dehydrogenase         | 0.88    | CDS    |
| SMc00781                                       | <i>iolA</i>  | Methylmalonate-semialdehyde dehydrogenase           | 0.82    | CDS    |
| SMc00433                                       | <i>iolE</i>  | Putative myo-inositol catabolism protein            | 0.78    | CDS    |
| SMc02518                                       |              | Putative glycerol-3-phosphate ABC transporter       | 0.73    | CDS    |
| SMc03858                                       | <i>pheAa</i> | Putative chorismate mutase                          | 0.71    | CDS    |
| <i>Information storage and processing (11)</i> |              |                                                     |         |        |
| SMc02489                                       | <i>xerC</i>  | Putative tyrosine recombinase                       | 2.40    | 5'UTR  |
| SMB20847                                       |              | Putative DNA-binding transcriptional regulator      | 1.49    | CDS    |
| SMc01164                                       | <i>iolR</i>  | Putative transcriptional repressor of myo-inositol  | 0.87    | 5'UTR  |
| SMc01310                                       | <i>rpsJ</i>  | Probable 30S ribosomal protein S10                  | 0.83    | CDS    |
| SMc01298                                       | <i>rplX</i>  | Probable 50S ribosomal protein L24                  | 0.79    | CDS    |
| SMc01309                                       | <i>rplC</i>  | Probable 50S ribosomal protein L3                   | 0.78    | CDS    |
| SMc03859                                       | <i>rpsP</i>  | Probable 30S ribosomal protein S16                  | 0.78    | CDS    |
| SMc01308                                       | <i>rplD</i>  | Probable 50S ribosomal protein L4                   | 0.76    | CDS    |
| SMc00335                                       | <i>rpsA</i>  | 30S ribosomal protein S1                            | 0.73    | 5'UTR  |
| SMc02101                                       | <i>rpsB</i>  | Probable 30S ribosomal protein S2                   | 0.71    | CDS    |
| SMc01299                                       | <i>rplN</i>  | Probable 50S ribosomal protein L14                  | 0.70    | CDS    |
| <i>Poorly characterized (10)</i>               |              |                                                     |         |        |
| SMc01108                                       |              | Putative tRNA (guanine-N(7)-)-methyltransferase     | 2.36    | 3'UTR  |
| SMc02221                                       |              | Conserved hypothetical protein                      | 1.98    | 5'UTR  |
| SMc01163                                       |              | Putative oxidoreductase                             | 1.46    | CDS    |
| SMc01200                                       |              | Transmembrane protein. Periplasm Signal             | 1.43    | CDS    |
| SMB20422                                       |              | Putative alcohol dehydrogenase                      | 1.35    | 3'UTR  |
| SMc02056                                       |              | Conserved outer membrane protein                    | 1.31    | CDS    |
| SMc00656                                       |              | Acyl-CoA N-acyltransferase.                         | 1.18    | CDS    |
| SMB20899                                       | <i>idhA</i>  | Hypothetical myo-inositol dehydrogenase protein     | 0.83    | CDS    |
| SMc00332                                       |              | Hypothetical protein                                | 0.72    | CDS    |
| SMc02051                                       |              | Conserved hypothetical protein                      | 0.71    | CDS    |

The M value represents the  $\log_2$  ratio of transcript levels.
