# Supplementary material for: A Stress-Induced Small RNA Modulates Alpha-Rhizobial Cell Cycle Progression
Source: PubMed Central journal article supplement (PMC4414408; doi:10.1371/journal.pgen.1005153), 2015-04-29
Supplement: pgen.1005153.s005.pdf [file pgen.1005153.s005.pdf]

**S5 Table. Genes and 5’-/3’-UTRs displaying decreased expression 4 hours after induction of EcpR1 overproduction (P-value ≤ 0.05 and M ≥ 0.7 or ≤ -0.7).**

| Gene ID                                       | Name                      | Description                                                    | M value             | Region              |
|-----------------------------------------------|---------------------------|----------------------------------------------------------------|---------------------|---------------------|
| <i>Cellular processes and signaling (6)</i>   |                           |                                                                |                     |                     |
| <b>SMc00888</b>                               |                           | <b>Putative 2-component receiver domain protein</b>            | <b>-0.99</b>        | <b>CDS</b>          |
| <b>SMc00887</b>                               |                           | <b>Diguanylate cyclase/phosphodiesterase</b>                   | <b>-0.90</b>        | <b>CDS</b>          |
| SMc03090                                      | <i>chew3</i>              | Putative chemotaxis protein                                    | -0.87               | 5'UTR               |
| SMc00023                                      |                           | Putative DSBA oxidoreductase                                   | -0.74               | CDS                 |
| SMc02868                                      |                           | Putative multidrug efflux system                               | -0.73               | 5'UTR               |
| <b>SMc00059</b>                               | <b><i>divJ</i></b>        | <b>Histidine protein kinase (cell division)</b>                | <b>-0.71</b>        | <b>CDS</b>          |
| <i>Metabolism (11)</i>                        |                           |                                                                |                     |                     |
| SMc01020                                      |                           | Putative oxidoreductase                                        | -3.48               | CDS                 |
| SMB20338                                      |                           | Putative transporter                                           | -2.16               | CDS                 |
| SMB20484                                      | <i>supA</i>               | Putative ABC transporter periplasmic sugar-binding             | -1.65               | 5'UTR               |
| SMB21168                                      |                           | Putative inner membrane transport protein                      | -1.52               | CDS                 |
| SMA1163                                       |                           | Cation transport P-type ATPase                                 | -0.95               | CDS                 |
| SMc02677                                      | <i>proC</i>               | Probable pyrroline-5-carboxylate reductase                     | -0.87               | CDS                 |
| SMc01971                                      | <i>puuC</i>               | Putative gamma-glutamyl-gamma-aminobutyraldehyde dehydrogenase | -0.80               | 5'UTR               |
| SMA0855                                       | <i>nodP1</i>              | ATP-sulfurylase small subunit                                  | -0.75               | 5'UTR               |
| SMB21192                                      | <i>cbbA2</i>              | Putative fructose-bisphosphate aldolase                        | -0.71               | 3'UTR               |
| SMc04386                                      | <i>aatB</i>               | Aspartate aminotransferase B                                   | -0.70               | 3'UTR               |
| <i>Information storage and processing (9)</i> |                           |                                                                |                     |                     |
| SMc01336                                      | <i>rne</i>                | Ribonuclease E                                                 | -1.78               | 5'UTR               |
| SMc02851                                      |                           | Transcriptional regulator, MarR family                         | -1.36               | CDS                 |
| SMB20665                                      |                           | Partial transposase of insertion ISRM17 protein                | -1.13               | CDS                 |
| <b>SMc00021</b>                               | <b><i>ccrM</i></b>        | <b>Cell cycle-regulated adenine DNA methyltransferase</b>      | <b>-1.13</b>        | <b>3'UTR</b>        |
| SMc00289                                      | <i>cspA5</i>              | Putative cold shock transcription regulator                    | -0.89               | 5'UTR               |
| SMc03958                                      | <i>tolQ</i>               | Putative transport transmembrane protein                       | -0.82               | 5'UTR               |
| SMc01714                                      |                           | Hypothetical transmembrane protein                             | -0.77               | CDS                 |
| SMc00108                                      |                           | Putative acetyltransferase                                     | -0.76               | 5'UTR               |
| SMc03874                                      |                           | Hypothetical protein                                           | -0.75               | 5'UTR               |
| <i>Cell motility (8)</i>                      |                           |                                                                |                     |                     |
| SMc03038                                      | <i>flaB</i>               | Flagellin B protein                                            | -2.51               | CDS                 |
| SMc03037                                      | <i>flaA</i>               | Flagellin A protein                                            | -2.32               | CDS                 |
| SMc03049                                      | <i>flgL</i>               | Putative flagellar hook-associated protein                     | -1.92               | CDS                 |
| SMc04114                                      | <i>pilA1</i>              | Putative pilin subunit protein                                 | -1.36               | CDS                 |
| SMc03051                                      | <i>flbT</i>               | Putative flagellin synthesis repressor protein                 | -1.19               | CDS                 |
| SMc03052                                      | <i>flbD</i>               | Putative basal-body rod modification protein                   | -1.09               | CDS                 |
| SMc03039                                      | <i>flaD</i>               | Flagellin D protein                                            | -0.90               | CDS                 |
| SMc03050                                      | <i>flaF</i>               | Putative flagellin synthesis regulator                         | -0.87               | CDS                 |
| <i>Poorly characterized (18)</i>              |                           |                                                                |                     |                     |
| SMc03107                                      |                           | Conserved hypothetical protein                                 | -2.83               | CDS                 |
| SMB20848                                      |                           | Conserved hypothetical membrane protein                        | -2.34               | CDS                 |
| SMc00239                                      |                           | Conserved hypothetical transmembrane protein                   | -2.30               | CDS                 |
| SMc01001                                      |                           | Hypothetical transmembrane protein                             | -2.04               | 5'UTR               |
| SMcORF4                                       |                           | Hypothetical protein                                           | -1.94               | 5'UTR               |
| SMB21211                                      |                           | Putative membrane protein                                      | -1.41               | 5'UTR               |
| SMc03746                                      |                           | Hypothetical protein                                           | -1.28               | CDS                 |
| SMA0661                                       |                           | Conserved hypothetical protein                                 | -0.98               | 5'UTR               |
| SMA0667                                       |                           | Conserved hypothetical protein                                 | -0.93               | 5'UTR               |
| SMc02392                                      |                           | Hypothetical protein                                           | -0.87               | 5'UTR               |
| SMc03161                                      |                           | Glucose-fructose oxidoreductase                                | -0.83               | 5'UTR               |
| <b><u>SMc02139</u></b>                        | <b><u><i>gcrA</i></u></b> | <b><u>Cell cycle regulator</u></b>                             | <b><u>-0.76</u></b> | <b><u>5'UTR</u></b> |
| SMc00507                                      |                           | Hypothetical protein                                           | -0.76               | CDS                 |
| SMA0907                                       |                           | Conserved hypothetical protein                                 | -0.75               | 5'UTR               |
| SMc03832                                      |                           | Conserved hypothetical signal peptide protein                  | -0.72               | CDS                 |
| SMc04010                                      |                           | Conserved hypothetical protein                                 | -0.71               | 5'UTR               |
| SMB22001                                      | <i>msbA2</i>              | Surface saccharide ABC transporter ATP-binding                 | -0.70               | 3'UTR               |
| SMc03013                                      |                           | Conserved hypothetical protein                                 | -0.70               | CDS                 |

The M value represents the log<sub>2</sub> ratio of transcript levels.

Cell cycle related candidates are indicated in bold and experimentally confirmed targets are underlined.
