# Supplementary material for: A Stress-Induced Small RNA Modulates Alpha-Rhizobial Cell Cycle Progression
Source: PubMed Central journal article supplement (PMC4414408; doi:10.1371/journal.pgen.1005153), 2015-04-29
Supplement: pgen.1005153.s006.pdf [file pgen.1005153.s006.pdf]

**S6 Table. Genes and 5’-/3’-UTRs displaying increased expression 4 hours after induction of EcpR1 overproduction (P-value  $\leq 0.05$  and M  $\geq 0.7$  or  $\leq -0.7$ ).**

| Gene ID                                       | Name                      | Description                                           | M value            | Region               |
|-----------------------------------------------|---------------------------|-------------------------------------------------------|--------------------|----------------------|
| <i>Cellular processes and signaling (2)</i>   |                           |                                                       |                    |                      |
| SMc02833                                      | <i>mepA</i>               | Putative murein endopeptidase transmembrane           | 1.15               | 5' UTR               |
| SMc03941                                      |                           | Conserved hypothetical transmembrane protein          | 0.86               | 5' UTR               |
| <i>Metabolism (10)</i>                        |                           |                                                       |                    |                      |
| SMa0203                                       |                           | ABC transporter                                       | 3.73               | CDS                  |
| SMc01631                                      |                           | ABC transporter ATP-binding protein                   | 3.51               | CDS                  |
| SMa0077                                       |                           | Galactose mutarotase and related enzyme               | 1.62               | CDS                  |
| SMc00549                                      |                           | Hypothetical protein                                  | 1.35               | CDS                  |
| SMb21338                                      |                           | Putative molybdopterin binding protein                | 1.14               | CDS                  |
| SMc03776                                      | <i>proB1</i>              | Probable glutamate 5-kinase                           | 0.95               | CDS                  |
| SMa1408                                       |                           | Putative dehydratase                                  | 0.84               | CDS                  |
| SMc00781                                      | <i>iolA</i>               | Methylmalonate-semialdehyde dehydrogenase             | 0.83               | CDS                  |
| SMc00595                                      | <i>ndk</i>                | Probable nucleoside diphosphate kinase                | 0.81               | CDS                  |
| SMc02686                                      | <i>prsA</i>               | Probable ribose-phosphate pyrophosphokinase           | 0.73               | CDS                  |
| <i>Information storage and processing (5)</i> |                           |                                                       |                    |                      |
| SMb20847                                      |                           | Probable transcriptional regulator                    | 1.65               | CDS                  |
| <b><u>SMc01167</u></b>                        | <b><u><i>dnaA</i></u></b> | <b><u>Chromosomal replication initiator</u></b>       | <b><u>1.42</u></b> | <b><u>5' UTR</u></b> |
| SMc02912                                      | <i>nusA</i>               | Probable N utilization substance protein A            | 1.04               | CDS                  |
| SMa0181                                       | <i>cspA7</i>              | CspA7 cold shock protein                              | 0.89               | CDS                  |
| SMc02802                                      |                           | Putative DNA polymerase III, delta subunit            | 0.80               | CDS                  |
| <i>Poorly characterized (8)</i>               |                           |                                                       |                    |                      |
| SMc01518                                      |                           | Hypothetical protein                                  | 2.82               | CDS                  |
| SMc00656                                      |                           | Conserved hypothetical protein                        | 2.64               | CDS                  |
| SMc02221                                      |                           | Conserved hypothetical protein                        | 2.32               | 5' UTR               |
| SMc01200                                      |                           | Conserved hypothetical protein, required for motility | 2.25               | CDS                  |
| SMc02056                                      |                           | Conserved hypothetical protein                        | 1.59               | CDS                  |
| SMc03005                                      |                           | Hypothetical transmembrane protein                    | 1.18               | CDS                  |
| SMc00591                                      |                           | Conserved hypothetical protein                        | 0.86               | CDS                  |
| SMa0649                                       |                           | Hypothetical/unknown signal peptide protein           | 0.82               | CDS                  |

The M value represents the log<sub>2</sub> ratio of transcript levels.

Cell cycle related candidates are indicated in bold and experimentally confirmed targets are underlined.
