# Supplementary material for: A Stress-Induced Small RNA Modulates Alpha-Rhizobial Cell Cycle Progression
Source: PubMed Central journal article supplement (PMC4414408; doi:10.1371/journal.pgen.1005153), 2015-04-29
Supplement: pgen.1005153.s007.pdf [file pgen.1005153.s007.pdf]

**S7 Table. Genes and 5'-/3'-UTRs displaying decreased expression in 2011*ecpRI* versus Rm2011 wild type growing in MOPS medium (P-value  $\leq 0.05$  and  $M \geq 0.7$  or  $\leq -0.7$ ).**

| Gene ID                                       | Name               | Description                                         | M value             | Region              |
|-----------------------------------------------|--------------------|-----------------------------------------------------|---------------------|---------------------|
| <i>Cellular processes and signaling (4)</i>   |                    |                                                     |                     |                     |
| SMc00999                                      |                    | Type IV pilus assembly PilZ-like protein            | -0.79               | CDS                 |
| SMc01410                                      |                    | Putative lipoprotein transmembrane                  | -0.76               | 5'UTR               |
| <b><u>SMc01167</u></b>                        | <b><u>dnaA</u></b> | <b><u>Chromosomal replication initiator</u></b>     | <b><u>-0.74</u></b> | <b><u>5'UTR</u></b> |
| SMc02833                                      | <i>mepA</i>        | Putative murein endopeptidase transmembrane protein | -0.67               | 5'UTR               |
| <i>Metabolism (7)</i>                         |                    |                                                     |                     |                     |
| SMb21438                                      |                    | TRAP-type transporter, periplasmic solute-binding   | -1.30               | CDS                 |
| SMc02450                                      | <i>argJ</i>        | Probable Arginine biosynthesis bifunctional protein | -0.84               | CDS                 |
| SMc04239                                      |                    | Hypothetical protein                                | -0.83               | 5'UTR               |
| SMc04028                                      | <i>gltB</i>        | Probable glutamate synthase NADPH large chain       | -0.80               | 5'UTR               |
| SMb21635                                      | <i>paaZ</i>        | Aldehyde dehydrogenase (NAD <sup>+</sup> )          | -0.76               | CDS                 |
| SMc04294                                      |                    | Putative peptide ABC transporter                    | -0.73               | CDS                 |
| SMc01118                                      |                    | Putative peptidase                                  | -0.68               | CDS                 |
| <i>Information storage and processing (2)</i> |                    |                                                     |                     |                     |
| SMb20162                                      |                    | Probable transcriptional regulator                  | -1.28               | 5'UTR               |
| SMb21601                                      |                    | Putative transcriptional regulator                  | -0.77               | 5'UTR               |
| <i>Poorly characterized (5)</i>               |                    |                                                     |                     |                     |
| SMb20273                                      |                    | Hypothetical protein                                | -1.05               | 5'UTR               |
| SMb21456                                      |                    | Hypothetical protein                                | -0.99               | CDS                 |
| SMb21413                                      |                    | Hypothetical protein                                | -0.83               | CDS                 |
| SMA0604                                       |                    | Conserved hypothetical protein                      | -0.79               | 5'UTR               |
| SMb20010                                      |                    | Predicted hydrolase or acyltransferase              | -0.71               | CDS                 |

The M value represents the log<sub>2</sub> ratio of transcript levels.

Cell cycle related candidates are denoted in bold and experimentally confirmed targets are underlined.
