# Supplementary material for: A Stress-Induced Small RNA Modulates Alpha-Rhizobial Cell Cycle Progression
Source: PubMed Central journal article supplement (PMC4414408; doi:10.1371/journal.pgen.1005153), 2015-04-29
Supplement: pgen.1005153.s009.pdf [file pgen.1005153.s009.pdf]

**S9 Table. Genes and 5'-/3'-UTRs displaying decreased expression in 2011*ecpR1* versus Rm2011 wild type growing in MOPSlim medium (P-value  $\leq 0.05$  and  $M \geq 0.7$  or  $\leq -0.7$ ).**

| Gene ID                                       | Name                      | Description                                            | M value             | Region              |
|-----------------------------------------------|---------------------------|--------------------------------------------------------|---------------------|---------------------|
| <i>Metabolism (6)</i>                         |                           |                                                        |                     |                     |
| SMa0376                                       |                           | Hydrolase                                              | -1.44               | CDS                 |
| SMb21224                                      | <i>nodQ</i>               | Putative sulfate adenylyltransferase                   | -0.80               | CDS                 |
| SMc00873                                      | <i>kup1</i>               | Probable KUP system potassium uptake protein           | -0.76               | CDS                 |
| SMb21223                                      | <i>nodP2</i>              | Putative sulfate adenylyltransferase subunit 2 protein | -0.73               | CDS                 |
| SMa0203                                       |                           | Putative ABC transporter                               | -0.72               | CDS                 |
| SMa0855                                       | <i>nodP1</i>              | Sulphate adenylyltransferase, small subunit            | -0.70               | CDS                 |
| <i>Cellular processes and signaling (3)</i>   |                           |                                                        |                     |                     |
| <b><u>SMc01167</u></b>                        | <b><u><i>dnaA</i></u></b> | <b><u>Chromosomal replication initiator</u></b>        | <b><u>-0.89</u></b> | <b><u>5'UTR</u></b> |
| SMb21240                                      |                           | Putative MPA1 family protein                           | -0.78               | CDS                 |
| SMc00047                                      | <i>bla</i>                | Putative beta-lactamase signal peptide protein         | -0.71               | CDS                 |
| <i>Information storage and processing (1)</i> |                           |                                                        |                     |                     |
| SMb20078                                      |                           | Probable response regulator                            | -0.86               | 3'UTR               |
| <i>Poorly characterized (7)</i>               |                           |                                                        |                     |                     |
| SMc03149                                      |                           | Hypothetical protein                                   | -1.69               | 5'UTR               |
| SMb20829                                      |                           | Putative secreted calcium-binding protein              | -1.15               | CDS                 |
| SMc00281                                      |                           | Hypothetical signal peptide protein                    | -0.97               | CDS                 |
| SMb20518                                      |                           | Predicted chitinase                                    | -0.92               | 3'UTR               |
| SMa0380                                       |                           | Conserved hypothetical protein                         | -0.88               | CDS                 |
| SMb20079                                      |                           | Probable response regulator                            | -0.79               | 3'UTR               |
| SMa0364                                       |                           | Hypothetical protein                                   | -0.75               | CDS                 |
| SMc00734                                      |                           | Probable transporter                                   | -0.74               | CDS                 |
| SMb20841                                      |                           | Hypothetical membrane-anchored protein                 | -0.72               | CDS                 |

The M value represents the  $\log_2$  ratio of transcript levels.

Cell cycle related candidates are denoted in bold and experimentally confirmed targets are underlined.
