# Supplementary material for: A Stress-Induced Small RNA Modulates Alpha-Rhizobial Cell Cycle Progression
Source: PubMed Central journal article supplement (PMC4414408; doi:10.1371/journal.pgen.1005153), 2015-04-29
Supplement: pgen.1005153.s010.pdf [file pgen.1005153.s010.pdf]

**S10 Table. Genes and 5′-/3′-UTRs displaying increased expression in 2011*ecpRI* versus Rm2011 wild type growing in MOPSlim medium (P-value ≤ 0.05 and M ≥ 0.7 or ≤ -0.7).**

| Gene ID                                 | Name               | Description                                                | M value     | Region       |
|-----------------------------------------|--------------------|------------------------------------------------------------|-------------|--------------|
| Cellular processes and signaling (8)    |                    |                                                            |             |              |
| <b>SMc02369</b>                         | <b><i>pleC</i></b> | <b>Sensor histidine kinase, DivK phosphatase</b>           | <b>1.02</b> | <b>CDS</b>   |
| SMb20941                                | <i>exsA</i>        | MsbA-like saccharide exporting ABC transporter protein     | 0.82        | 5′UTR        |
| SMa1337                                 |                    | ABC transporter, periplasmic solute-binding protein        | 0.76        | CDS          |
| SMc00794                                |                    | Putative 2-component receiver domain protein               | 0.75        | 5′UTR        |
| SMa1686                                 |                    | Two-component response regulator                           | 0.73        | CDS          |
| SMc00185                                |                    | Putative ABC transporter ATP-binding transmembrane         | 0.72        | 5′UTR        |
| SMc00857                                | <i>sohB</i>        | Probable proteinase                                        | 0.71        | 5′UTR        |
| SMa0114                                 |                    | Putative sensory transduction regulatory protein           | 0.70        | CDS          |
| Metabolism (11)                         |                    |                                                            |             |              |
| SMb20158                                |                    | Hypothetical ABC transporter                               | 3.22        | CDS          |
| SMb20156                                |                    | Putative ABC transporter ATP-binding protein               | 3.11        | CDS          |
| SMb20157                                |                    | Hypothetical ABC transporter                               | 2.89        | CDS          |
| SMb20155                                |                    | Putative ABC transporter permease                          | 2.57        | 5′UTR        |
| SMc03253                                |                    | L-proline cis-4-hydroxylase                                | 2.31        | CDS          |
| SMa1223                                 | <i>fixM</i>        | Flavoprotein oxidoreductase                                | 1.87        | CDS          |
| SMb20151                                |                    | Protein-tyrosine phosphatase                               | 1.52        | CDS          |
| SMc01845                                | <i>mltB2</i>       | Membrane-bound lytic murein transglycosylase B             | 1.18        | CDS          |
| SMc01871                                | <i>ddl</i>         | Probable D-alanine ligase, cell shape wall biogenesis      | 1.16        | CDS          |
| SMc02755                                | <i>ahcY</i>        | Adenosylhomocysteina hydrolase                             | 0.81        | 5′UTR        |
| SMb20316                                |                    | ABC transporter, periplasmic solute-binding protein        | 0.73        | 3′UTR        |
| Information storage and processing (13) |                    |                                                            |             |              |
| SMa1225                                 | <i>fixK1</i>       | Transcriptional regulator                                  | 1.86        | CDS          |
| SMa0762                                 | <i>fixK2</i>       | Transcriptional regulator                                  | 1.41        | CDS          |
| <b>SMc01858</b>                         | <b><i>mraW</i></b> | <b>S-adenosyl-L-methionine-dependent methyltransferase</b> | <b>1.34</b> | <b>CDS</b>   |
| <b>SMc01857</b>                         | <b><i>mraZ</i></b> | <b>Cell division protein</b>                               | <b>1.30</b> | <b>CDS</b>   |
| SMc01260                                |                    | Putative transcriptional regulator, merR family protein    | 1.07        | 3′UTR        |
| SMc03863                                | <i>rplS</i>        | Probable 50S ribosomal protein L19                         | 1.02        | 5′UTR        |
| SMc01295                                | <i>rpsH</i>        | Probable 30S ribosomal protein S8                          | 0.82        | CDS          |
| SMa0789                                 |                    | Transcriptional regulator, GntR family                     | 0.82        | CDS          |
| SMc01842                                |                    | Probable transcriptional regulator                         | 0.82        | CDS          |
| SMc01295                                | <i>rpsH</i>        | Probable 30S ribosomal protein S8                          | 0.82        | CDS          |
| SMa0789                                 |                    | Transcriptional regulator, GntR family                     | 0.82        | CDS          |
| <b>SMc00561</b>                         | <b><i>dnaB</i></b> | <b>Probable replicative DNA helicase</b>                   | <b>0.75</b> | <b>5′UTR</b> |
| SMc01287                                | <i>rpsM</i>        | Probable 30S ribosomal protein S13                         | 0.70        | CDS          |
| Poorly characterized (12)               |                    |                                                            |             |              |
| SMb21285                                |                    | Transthyretin-like protein                                 | 1.33        | CDS          |
| SMc01902                                |                    | Hypothetical protein                                       | 0.95        | CDS          |
| SMb20041                                |                    | Hypothetical protein                                       | 0.90        | 5′UTR        |
| SMb20222                                |                    | Hypothetical protein                                       | 0.84        | 5′UTR        |
| SMc02401                                |                    | Hypothetical transmembrane protein                         | 0.83        | 3′UTR        |
| SMa1178                                 |                    | Conserved hypothetical protein                             | 0.80        | CDS          |
| SMc02081                                |                    | Hypothetical protein                                       | 0.78        | 5′UTR        |
| SMc00800                                |                    | Hypothetical transmembrane protein                         | 0.75        | CDS          |
| SMb21281                                |                    | Putative integral membrane transporter protein             | 0.75        | 5′UTR        |
| SMb20066                                |                    | Hypothetical protein                                       | 0.71        | 5′UTR        |
| SMb20082                                |                    | Conserved hypothetical protein                             | 0.74        | CDS          |
| SMa2237                                 |                    | Hypothetical protein                                       | 0.74        | 5′UTR        |

The M value represents the log<sub>2</sub> ratio of transcript levels.

Cell cycle related candidates are indicated in bold and experimentally confirmed targets are underlined.
