# Supplementary material for: A Stress-Induced Small RNA Modulates Alpha-Rhizobial Cell Cycle Progression
Source: PubMed Central journal article supplement (PMC4414408; doi:10.1371/journal.pgen.1005153), 2015-04-29
Supplement: pgen.1005153.s011.pdf [file pgen.1005153.s011.pdf]

**S11 Table. Bacterial strains and plasmids used in this study.**

| Strain/Plasmid                                 | Relevant Characteristics                                                                                                                                   | Source or reference   |
|------------------------------------------------|------------------------------------------------------------------------------------------------------------------------------------------------------------|-----------------------|
| <i>S. meliloti</i>                             |                                                                                                                                                            |                       |
| Rm2011                                         | Nx <sup>r</sup> , Sm <sup>r</sup> , <i>expR</i> <sup>+</sup> ; Sm resistant derivative of <i>S. meliloti</i> SU47. Referred to as wild type in this study. | [90]                  |
| 2011 <i>ecpR1</i>                              | <i>ecpR1</i> deletion mutant                                                                                                                               | This work             |
| 2011Pσ70 <i>ecpR1</i>                          | 2011 carrying changes in the <i>ecpR1</i> σ <sup>70</sup> -dependent promoter -10 region                                                                   | This work             |
| 2011 <i>rpoN::Tn5</i>                          | 2011 carrying a mini-Tn5 inserted in <i>rpoN</i> Km <sup>r</sup>                                                                                           | [91]                  |
| 2011 <i>mcherry</i>                            | 2011 labeled with <i>mCherry</i> by a single chromosomal integration of pKOSm                                                                              | This work             |
| 2011 <i>egfp</i>                               | 2011 labeled with <i>egfp</i> by a single chromosomal integration of pKOSe                                                                                 | This work             |
| 2011 <i>ecpR1 egfp</i>                         | 2011 <i>ecpR1</i> labeled with <i>egfp</i> by a single chromosomal integration of pKOSe                                                                    | This work             |
| 2011 <i>relA</i>                               | <i>relA</i> deletion mutant                                                                                                                                | [38]                  |
| Sm2B6015                                       | Rm2011 <i>visN</i> mutant                                                                                                                                  | [42]                  |
| <i>gcrA</i> -eGFP                              | 2011 carrying the fusion protein GcrA-EGFP                                                                                                                 | [46]                  |
| 2011 <i>gcrA</i> -P <sub>lac</sub> <i>gcrA</i> | <i>gcrA</i> deletion mutant carrying P <sub>lac</sub> <i>gcrA</i>                                                                                          | This work             |
| 2011 <i>hfq</i>                                | <i>hfq</i> insertion mutant, Gm <sup>r</sup>                                                                                                               | [92]                  |
| Rm4011                                         | 2011 derivative strain, <i>expR/sinI</i> double mutant. Nx <sup>r</sup> , Sm <sup>r</sup>                                                                  | [81]                  |
| 4011 <i>ecpR1</i>                              | <i>ecpR1</i> deletion mutant                                                                                                                               | This work             |
| 4011 <i>ecpR1 rne675</i>                       | 2011 carrying pK18mobII inserted in the 675th codon of <i>rne</i> , Km <sup>r</sup>                                                                        | [59]                  |
| <i>S. medicae</i> WSM419                       | Acid <sup>t</sup> , sardinian isolate; Nx <sup>r</sup> , Cm <sup>r</sup>                                                                                   | [93]                  |
| <i>S. fredii</i> NGR234                        | Broad-host-range bacterium isolated from <i>Lablab purpureus</i> , Rf <sup>r</sup>                                                                         | [94]                  |
| <i>A. tumefaciens</i> C58                      | Wild-type, isolated from a cherry tree ( <i>Prunus</i> ) tumor Nx <sup>r</sup>                                                                             | [95]                  |
| <i>A. radiobacter</i> ATCC19358 <sup>T</sup>   | <i>A. radiobacter</i> type strain, isolated from soil. Nx <sup>r</sup>                                                                                     | [96]                  |
| <i>R. etli</i> CFN42 <sup>T</sup>              | <i>R. etli</i> type strain, isolated from <i>Phaseolus</i> Nx <sup>r</sup> , Sm <sup>r</sup>                                                               | [97]                  |
| <i>R. tropici</i> CIAT899 <sup>T</sup>         | <i>R. tropici</i> type strain, isolated from <i>P. vulgaris</i> . Sm <sup>r</sup>                                                                          | [98]                  |
| <i>E. coli</i>                                 |                                                                                                                                                            |                       |
| DH5α                                           | F- <i>endA1 supE44 thi-11-recA1 gyrA96 relA1 deoRD(lacZYA-argF)U169</i>                                                                                    | [99]                  |
| S17-1                                          | <i>E. coli</i> 294 Thi RP4-2-Tc::Mu-Km::Tn7 integrated into the chromosome                                                                                 | [100]                 |
| Plasmids                                       |                                                                                                                                                            |                       |
| pPHUtrap                                       | pPHU231 containing <i>sinI</i> 5'UTR fused to <i>egfp</i> , Tc <sup>r</sup>                                                                                | Matthew McIntosh      |
| p <i>PecpR1</i> _5'1-204                       | pPHUtrap with <i>ecpR1</i> promoter- <i>egfp</i> transcriptional fusion of the whole IGR                                                                   | This work             |
| p <i>PecpR1</i> _5'1                           | pPHUtrap with <i>ecpR1</i> promoter- <i>egfp</i> transcriptional fusion until 1 <sup>st</sup> 5'-end                                                       | This work             |
| p <i>PecpR1</i> _5'2                           | pPHUtrap with <i>ecpR1</i> promoter- <i>egfp</i> transcriptional fusion until 2 <sup>nd</sup> 5'-end                                                       | This work             |
| p <i>PecpR1</i> _5'2-Pσ70                      | pTSS2- <i>egfp</i> carrying changes in the σ <sup>70</sup> -dependent promoter -10 region                                                                  | This work             |
| pK18 <i>mobsacB</i>                            | Suicide plasmid in <i>S. meliloti</i> , <i>sacB</i> , <i>oriV</i> , Km <sup>r</sup>                                                                        | [80]                  |
| pK <i>delecpR1</i>                             | pK18 <i>mobsacB</i> with <i>ecpR1</i> flanking regions for geneSOEing                                                                                      | This work             |
| pKPσ70 <i>ecpR1</i>                            | pK18 <i>mobsacB</i> with <i>ecpR1</i> locus region carrying changes in the σ <sup>70</sup> -dependent promoter -10 region for double recombination         | This work             |
| pK <i>delgcrA</i>                              | pK18 <i>mobsacB</i> with <i>gcrA</i> flanking regions for geneSOEing                                                                                       | This work             |
| pK18mobII                                      | Suicide vector; mob lacZ Km <sup>r</sup>                                                                                                                   | [101]                 |
| pKOSm                                          | pK18mobII with P <sub>T5</sub> : <i>mCherry</i> cassette fused to <i>recG</i>                                                                              | Oliver Schauer        |
| pKOSe                                          | pK18mobII with P <sub>T5</sub> : <i>egfp</i> cassette fused to <i>recG</i>                                                                                 | Pornsri Charoenpanich |
| pK18ins <i>gcrA</i> <sub>300</sub>             | pK18mobII carrying an internal fragment of <i>gcrA</i> , nt 4–297; Km <sup>r</sup>                                                                         | This work             |
| pSRKKm                                         | pBBR1MCS-2 derivative with a Plac promoter, <i>lacIq</i> , <i>lacZa</i> <sup>+</sup> , Km <sup>r</sup>                                                     | [102]                 |
| pRel <sub>Sm</sub>                             | pSRKKm carrying the Rel <sub>Sm</sub> coding sequence                                                                                                      | [38]                  |
| pSRKKm <i>divK</i>                             | pSRKKm carrying the <i>divK</i> coding sequence                                                                                                            | [32]                  |
| pSKControl <sup>+</sup>                        | pSRKKm carrying the <i>smel812</i> coding sequence fused to <i>sinR</i> -P <sub>sinI</sub>                                                                 | This work             |
| pSKEcpR1 <sup>+</sup>                          | pSRKKm carrying the <i>ecpR1</i> coding sequence starting from 5'1 fused to <i>sinR</i> -P <sub>sinI</sub>                                                 | This work             |
| pSKEcpR1 <sub>5'2</sub> <sup>+</sup>           | pSRKKm carrying the <i>ecpR1</i> coding sequence starting from 5'2 fused to <i>sinR</i> -P <sub>sinI</sub>                                                 | This work             |
| pSKEcpR1-1 <sup>+</sup>                        | pSKEcpR1 <sup>+</sup> carrying 1 nt change in the first conserved loop                                                                                     | This work             |
| pSKEcpR1-2 <sup>+</sup>                        | pSKEcpR1 <sup>+</sup> carrying 2 nt changes in the first conserved loop                                                                                    | This work             |

|                                                      |                                                                                                                          |                     |
|------------------------------------------------------|--------------------------------------------------------------------------------------------------------------------------|---------------------|
| pSKEcpR1-3 <sup>+</sup>                              | pSKEcpR1 <sup>+</sup> carrying 3 nt changes in the first conserved loop                                                  | This work           |
| pSRKGm                                               | pBBR1MCS-2 derivative with a Plac promoter, <i>lacIq</i> , <i>lacZa</i> <sup>+</sup> , Gm <sup>r</sup>                   | [102]               |
| P <sub>lac</sub> <i>gcrA</i>                         | pSRKGm carrying the <i>gcrA</i> <sub>Sm</sub> coding sequence                                                            | This work           |
| pSGControl <sup>+</sup>                              | pSRKGm with <i>smel812</i> coding sequence fused to <i>sinR</i> -P <sub>sinI</sub>                                       | Jan Philip Schlüter |
| pSGEcpR1 <sup>+</sup>                                | pSRKGm with the <i>ecpR1</i> coding sequence fused to <i>sinR</i> -P <sub>sinI</sub>                                     | Lars-Ole Loehr      |
| pWBT                                                 | pSRKGm carrying the T5 promoter sequence downstream the <i>lac</i> promoter                                              | Matthew McIntosh    |
| pWBT <i>pleD</i>                                     | pWBT carrying the <i>pleD</i> <sub>Sm</sub> coding sequence                                                              | Simon Schäper       |
| pR_EGFP                                              | Reporter fusion plasmid for cloning of sRNA targets, Tc <sup>r</sup> , Ap <sup>r</sup>                                   | [44]                |
| <i>pgcrA</i> <sub>.122+3-</sub> <i>egfp</i>          | pR_EGFP expressing the <i>gcrA</i> :: <i>egfp</i> translational fusion from TSS (-130)                                   | This work           |
| <i>pPgcrA</i> <sub>.122+3-</sub> <i>egfp</i>         | pR_EGFP expressing the <i>gcrA</i> :: <i>egfp</i> translational fusion from its own promoter (-223, relative to the AUG) | This work           |
| <i>pdnaA</i> <sub>.17+30-</sub> <i>egfp</i>          | pR_EGFP expressing the <i>dnaA</i> :: <i>egfp</i> translational fusion from TSS1                                         | This work           |
| <i>pdnaA</i> <sub>.56+30-</sub> <i>egfp</i>          | pR_EGFP expressing the <i>dnaA</i> :: <i>egfp</i> translational fusion from TSS2                                         | This work           |
| <i>pdnaA</i> <sub>.70+30-</sub> <i>egfp</i>          | pR_EGFP expressing the <i>dnaA</i> :: <i>egfp</i> translational fusion from TSS3                                         | This work           |
| <i>pdnaA</i> <sub>.154+30-</sub> <i>egfp</i>         | pR_EGFP expressing the <i>dnaA</i> :: <i>egfp</i> translational fusion from -154                                         | This work           |
| <i>pdnaA</i> <sub>.198+30-</sub> <i>egfp</i>         | pR_EGFP expressing the full <i>dnaA</i> :: <i>egfp</i> translational fusion from putTSS4                                 | This work           |
| <i>pdnaA</i> <sub>.198+162-</sub> <i>egfp</i>        | pR_EGFP expressing the full <i>dnaA</i> :: <i>egfp</i> translational fusion to +162                                      | This work           |
| <i>pctrA</i> <sub>.26+93-</sub> <i>egfp</i>          | pR_EGFP expressing the <i>ctrA</i> :: <i>egfp</i> translational fusion from TSS1                                         | This work           |
| <i>pctrA</i> <sub>.69+93-</sub> <i>egfp</i>          | pR_EGFP expressing the <i>ctrA</i> :: <i>egfp</i> translational fusion from TSS2                                         | This work           |
| <i>pminD</i> <sub>.105+3-</sub> <i>egfp</i>          | pR_EGFP expressing the <i>minD</i> :: <i>egfp</i> translational fusion                                                   | This work           |
| <i>ppleC</i> <sub>.153+132-</sub> <i>egfp</i>        | pR_EGFP expressing the <i>pleC</i> :: <i>egfp</i> translational fusion                                                   | This work           |
| <i>pftsZ</i> <sub>.99+108-</sub> <i>egfp</i>         | pR_EGFP expressing the <i>ftsZ</i> :: <i>egfp</i> translational fusion                                                   | This work           |
| <i>pdivJ</i> <sub>.112+126-</sub> <i>egfp</i>        | pR_EGFP expressing the <i>divJ</i> :: <i>egfp</i> translational fusion                                                   | This work           |
| <i>pSMc00888</i> <sub>.235+57-</sub> <i>egfp</i>     | pR_EGFP expressing the <i>SMc00888</i> :: <i>egfp</i> translational fusion                                               | This work           |
| <i>pdivK</i> <sub>.85+45-</sub> <i>egfp</i>          | pR_EGFP expressing the <i>divK</i> :: <i>egfp</i> translational                                                          | This work           |
| <i>pgcrA</i> -BS- <i>egfp</i>                        | <i>pgcrA</i> <sub>.122+3-</sub> <i>egfp</i> carrying 2 nt compensatory changes in <i>ecpR1</i> interaction region        | This work           |
| <i>pgcrA</i> -ATT- <i>egfp</i>                       | <i>pgcrA</i> <sub>.122+3-</sub> <i>egfp</i> carrying 3 nt changes in <i>ecpR1</i> interaction region                     | This work           |
| <i>pdnaA</i> <sub>.154+162-</sub> <i>egfp</i>        | pR_EGFP expressing the <i>dnaA</i> :: <i>egfp</i> translational fusion from -154 to +162                                 | This work           |
| <i>pdnaA</i> <sub>.154+162-</sub> BS5- <i>egfp</i>   | <i>pdnaA</i> <sub>.154+162-</sub> <i>egfp</i> carrying 5 nt changes in <i>ecpR1</i> predicted binding site 5             | This work           |
| <i>pdnaA</i> <sub>.56+30-</sub> BS4- <i>egfp</i>     | <i>pdnaA</i> <sub>.56+30-</sub> <i>egfp</i> carrying 5 nt changes in <i>ecpR1</i> binding site 4                         | This work           |
| <i>pdnaA</i> <sub>.56+30-</sub> BS3 <i>egfp</i>      | <i>pdnaA</i> <sub>.56+30-</sub> <i>egfp</i> carrying 3 nt changes in <i>ecpR1</i> binding site 3                         | This work           |
| <i>pdnaA</i> <sub>.56+30-</sub> BS3+4- <i>egfp</i>   | <i>pdnaA</i> <sub>.56+30-</sub> <i>egfp</i> carrying 8 nt changes in <i>ecpR1</i> binding sites 3 and 4                  | This work           |
| <i>pdnaA</i> <sub>.154+162-</sub> BS3+4- <i>egfp</i> | <i>pdnaA</i> <sub>.154+162-</sub> <i>egfp</i> carrying 8 nt changes in <i>ecpR1</i> binding sites 3 and 4                | This work           |
| <i>pdnaA</i> -BSs- <i>egfp</i>                       | <i>pdnaA</i> <sub>.56+30-</sub> <i>egfp</i> carrying 3 nt compensatory changes in <i>ecpR1</i> binding sites 3 and 4     | This work           |

### Supporting references

90. Casse F, Boucher, C., Julliot, J.S., Michel, M., and Denarie, J. (1979) Identification and characterization of large plasmids in *Rhizobium meliloti* using agarose-gel electrophoresis. J Gen Microbiol 113: 229–242.
91. Pobigaylo N, Wetter D, Szymczak S, Schiller U, Kurtz S, et al. (2006) Construction of a large signature-tagged mini-Tn5 transposon library and its application to mutagenesis of *Sinorhizobium meliloti*. Appl Environ Microbiol 72: 4329–4337.
92. Voss B, Hölscher M, Baumgarth B, Kalbfleisch A, Kaya C, et al. (2009) Expression of small RNAs in Rhizobiales and protection of a small RNA and its degradation products by Hfq in *Sinorhizobium meliloti*. Biochem Biophys Res Commun 390: 331–336.
93. Howieson JGaE, M. A. (1986) Acid tolerance in the *Rhizobium meliloti*–*Medicago* symbiosis. Aust J Agric Res 37: 55–64.
94. Jarvis BD, Downer HL, Young JP (1992) Phylogeny of fast-growing soybean-nodulating rhizobia support synonymy of *Sinorhizobium* and *Rhizobium* and assignment to *Rhizobium fredii*. Int J Syst Bacteriol 42: 93–96.
95. Hamilton RH, Fall MZ (1971) The loss of tumor-initiating ability in *Agrobacterium tumefaciens* by incubation at high temperature. Experientia 27: 229–230.
96. Popoff MY, Kersters K, Kiredjian M, Miras I, Coynault C (1984) Taxonomic position of *Agrobacterium* strains of hospital origin. Ann Microbiol (Paris) 135A: 427–442.
97. Quinto C, De La Vega H, Flores M, Leemans J, Cevallos MA, et al. (1985) Nitrogenase reductase: A functional multigene family in *Rhizobium phaseoli*. Proc Natl Acad Sci U S A 82: 1170–1174.

98. Martinez-Romero E, Segovia L, Mercante FM, Franco AA, Graham P, et al. (1991) *Rhizobium tropici*, a novel species nodulating *Phaseolus vulgaris* L. beans and *Leucaena* sp. trees. *Int J Syst Bacteriol* 41: 417-426.
99. Grant SG, Jessee J, Bloom FR, Hanahan D (1990) Differential plasmid rescue from transgenic mouse DNAs into *Escherichia coli* methylation-restriction mutants. *Proc Natl Acad Sci U S A* 87: 4645-4649.
100. Simon R, Priefer U, Pühler A (1983) A Broad Host Range Mobilization System for *In Vivo* Genetic Engineering: Transposon Mutagenesis in Gram Negative Bacteria. *Nature Biotechnology* 1: 784-791.
101. Tauch A, Zheng Z, Pühler A, Kalinowski J (1998) *Corynebacterium striatum* chloramphenicol resistance transposon Tn5564: genetic organization and transposition in *Corynebacterium glutamicum*. *Plasmid* 40: 126-139.
102. Khan SR, Gaines J, Roop RM, Farrand SK (2008) Broad-host-range expression vectors with tightly regulated promoters and their use to examine the influence of TraR and TraM expression on Ti plasmid quorum sensing. *Appl Environ Microbiol* 74: 5053-5062.
