# Supplementary material for: A Stress-Induced Small RNA Modulates Alpha-Rhizobial Cell Cycle Progression
Source: PubMed Central journal article supplement (PMC4414408; doi:10.1371/journal.pgen.1005153), 2015-04-29
Supplement: pgen.1005153.s012.pdf [file pgen.1005153.s012.pdf]

**S12 Table. Oligonucleotides used in this study.**

| Primer name                 | Sequence (5' -> 3')                           | Use in this study                                                                  |
|-----------------------------|-----------------------------------------------|------------------------------------------------------------------------------------|
| Smc291NP_F                  | CAGGCAATGCTGATAAGCGAGG                        | <i>epcR1</i> Northern probe                                                        |
| Smc291NP_R                  | TTCCGGCGCTTGAACCTGAA                          |                                                                                    |
| 5SRNA_F                     | TGGTTCTGGCGGGGTGGCTGC                         | 5S Northern probe                                                                  |
| 5SRNA_R                     | TACTCTCCCGCTCTTAAGACGAA                       |                                                                                    |
| Xp291-204_F1                | ccac <u>AAGCTT</u> CCGCCGCACATGCTGAGCTT       | Construction of <i>epcR1</i> promoter-<br><i>egfp</i> transcriptional fusions      |
| Xp291_F2                    | cgct <u>AAGCTT</u> CGACACTGTCCGATTCTGAA       |                                                                                    |
| HP291-5'-1_R1               | cgca <u>TCTAGA</u> TTCCTTCCTCGTTATCAGC        |                                                                                    |
| Hp291- 5'-2_R2              | cgcg <u>TCTAGA</u> ATCATGGGGTAACCGAATGCT      |                                                                                    |
| P291KO70_F                  | TTTTTAGTTTCAGGACCGATTGATAAGCGAGGAAGGAAAC      | Construction of pKdele <i>epR1</i>                                                 |
| P291KO70_R                  | ATCGGTCTGAAACTAAAAATCAAT                      |                                                                                    |
| 1Smc291KOSmaI_F2            | ccag <u>CCCGGG</u> ACGGACTACATCATGCGACC       | Construction of pK <i>epR1</i>                                                     |
| 2FusSmelC291KO_R            | CTCGCTTATCAGCATTGCGCTG                        |                                                                                    |
| 3FusSmC291KO_F              | CAGGCAATGCTGATAAGCGAGCTTCCGTTTCGTTTCAGGTTTC   | Construction of pK <i>epR1</i>                                                     |
| 4Smc291KOHind_R2            | gegt <u>AAGCTT</u> CAGCGAATCGCAGGCAGCG        |                                                                                    |
| 291pKO70SacI_F              | TTTTTAGTTTCAGGGAGCTCTGATAAGCGAGGAAGGAAAC      | Construction of pK <i>epR1</i>                                                     |
| 291pKO70SacI_R              | GAGCTCCCTGAAACTAAAAAAATCAAT                   |                                                                                    |
| 259up291 <i>pleD</i> _F     | GCTCTATCAGGCGAAGAACG                          | Confirming <i>epcR1</i> mutation                                                   |
| 271down291 <i>rpmG</i> _R   | GCTACCACCATCAAGATCAAGC                        |                                                                                    |
| 1 <i>gcrAKO</i> Hind_F      | ccag <u>AAGCTT</u> TGACGTGGAACCTCTCGACGTG     | Construction of pK <i>delgcrA</i>                                                  |
| 2Fus <i>gcrAKO</i> _R       | GGAATCCGTCACCGCTCTCCG                         |                                                                                    |
| 3Fus <i>gcrAKO</i> _F       | CGGAGAGCGGTGACGGATTCCGCTACCAGCCCTCTGCCGA      |                                                                                    |
| 4 <i>gcrAKO</i> BamHI_R     | gegt <u>GGATCC</u> GAAGATTGCCGTAGTCGAAGA      |                                                                                    |
| 200up <i>gcrA</i> _F        | TGCAACGCTCCGACAGCAAGT                         | Confirming <i>gcrA</i> chromosome<br>mutation                                      |
| 799down <i>gcrA</i> _R      | CATGACGGCTGTCGTGCGTAGA                        |                                                                                    |
| Hpk18ins <i>gcrA</i> F      | ccag <u>AAGCTT</u> AACTGAAGAAGCTGTGGTCCGGA    | Construction of pK18ins <i>gcrA</i> <sub>300</sub>                                 |
| Ecopkins <i>gcrA</i> 300R   | atat <u>GAATT</u> CCAGGTCGACTGCGAGCTCTTC      |                                                                                    |
| <i>sinR</i> _NdeIF          | gccca <u>CATATG</u> GCTAATCAACAGGCTGTC        | Construction of the <i>sinR</i> - <i>PsinI</i><br>fusion system for overexpression |
| TSS3_28bp_b_ <i>sinIR</i>   | GTAGCGATGCTGTCAGGCTC                          |                                                                                    |
| SmelC812_fwd                | GAGCCTGACAGCATCGCTACATCCTTGTCGTCCCTGCCTGCATAC | Construction of pSKControl <sup>+</sup> and<br>pSGControl <sup>+</sup>             |
| SmelC812_XbaI_rev           | tctg <u>TCTAGA</u> GAGAAGTCGTCCGCTTTCTCTG     |                                                                                    |
| SmelC291_fwd                | GAGCCTGACAGCATCGCTACGCGAGGAAGGAAACTCCACAG     | Construction of pSKE <i>epR1</i> <sup>+</sup> and<br>pSGE <i>epR1</i> <sup>+</sup> |
| SmelC291_XbaI_rev           | tctg <u>TCTAGA</u> TTCCGGCGCTTGAACCTGAAAC     |                                                                                    |
| SmelC291TSS2_F              | GAGCCTGACAGCATCGCTACTTACCCCATGATGCTCAGGTC     | Construction of pSKE <i>epR1</i> <sub>5:2+</sub>                                   |
| C291IRKO1_F                 | CATGATGCTCAGGTCCTCCGCTATCTCTGGGTCGTGG         |                                                                                    |
| C291IRKO1_R                 | GGGACCTGAGCATATGGGGTA                         | Construction of pSKE <i>epR1</i> -1 <sup>+</sup>                                   |
| C291IRKO2_F                 | CATGATGCTCAGGTCCTCCGCGC ATCTCTGGGTCGTGGGGT    |                                                                                    |
| C291IRKO2_R                 | CGGGGACCTGAGCATATGGGGTA                       |                                                                                    |
| C291IRKO3_F                 | CATGATGCTCAGGTCCTAAGCATCTCTGGGTCGTGGGGTC      |                                                                                    |
| C291IRKO3_R                 | TTAGGACCTGAGCATATGGGGTAA                      | Construction of pSKE <i>epR1</i> -3 <sup>+</sup>                                   |
| <i>gcrA</i> OEI_NdeI_F      | gccca <u>CATATG</u> AACTGGACTGACGAGCGG        |                                                                                    |
| <i>gcrA</i> OEI_BamHI_R2    | tctc <u>GGATCC</u> CGTCGTGCATCCAGAGCGGAATGAG  | Construction of P <sub>lac</sub> <i>gcrA</i>                                       |
| BHI5UTR <i>gcrA</i> _F2     | cgcg <u>GGATCC</u> CATTCAATTACTGACGCGCATG     |                                                                                    |
| H <i>pgcrA</i> +5UTR_F      | tctc <u>AAGCTT</u> ATGCAACGCTCCGACGCAAGT      | Construction of the 5'UTR- <i>egfp</i><br>fusions                                  |
| 5UTR <i>gcrANh</i> _R2      | acta <u>GCTAGC</u> CATCTCTGCACTCCCGTTCTCG     |                                                                                    |
| 5UTR <i>dnaA</i> -198_F     | atct <u>GGATCC</u> GCGAGGGGACATTTGCTTGAGG     |                                                                                    |
| 5UTR <i>dnaA</i> -154_F     | tata <u>GGATCC</u> GCGTGCCGTGGCGGGATATG       |                                                                                    |
| 5UTR <i>dnaA</i> -70_F      | tcta <u>GGATCC</u> GCGGGCGGCATAAAAGATGAG      |                                                                                    |
| 5UTR <i>dnaA</i> -56_F      | caga <u>GGATCC</u> AAGATGAGGCCGCCAGAAATGAC    |                                                                                    |
| 5UTR <i>dnaA</i> -17_F      | caga <u>GGATCC</u> AATTGGAAGGCGGCAAGATG       |                                                                                    |
| 5UTR <i>dnaA</i> +162_R2    | caeg <u>GCTAGC</u> AAACCAACTTGCGAAGACATC      |                                                                                    |
| 5UTR <i>dnaA</i> +30_R6     | atta <u>GCTAGC</u> ACCTCCAGGTGCCGTCCGCCA      |                                                                                    |
| BglII5UTR <i>ctrA</i> -26_F | atta <u>AGATCT</u> CTTGGGCGGCGGAAAAGGG        |                                                                                    |
| BglII5UTR <i>ctrA</i> -69_F | atta <u>AGATCT</u> AGGCAACGACTGGATCCGTA       |                                                                                    |
| 5UTR <i>ctrANh</i> +93_R2   | ccga <u>GCTAGC</u> ATCTGTGGTGTAGACGTTGA       |                                                                                    |
| 5UTR <i>minD</i> -105_F     | actt <u>GGATCC</u> TTAAGTACCGGGTTGCCCG        |                                                                                    |
| 5UTR <i>minD</i> +5_R       | ctac <u>GCTAGC</u> CATCTTCCCGCTCTGTGTG        |                                                                                    |
| BHI5UTR-170 <i>pleC</i> _F  | gact <u>GGATCC</u> CCTGTGATTCATTGAGTCAG       |                                                                                    |
| Nh5UTR <i>pleC</i> +135_R   | tgea <u>GCTAGC</u> CATTGCGAGCTTCTGCGACGC      |                                                                                    |
| BamHI <i>ftsZ</i> 1-99F     | gac <u>GGATCC</u> TTCTAGATCGGTCCGCATATC       |                                                                                    |
| NheI <i>ftsZ</i> 1+108R     | gtag <u>GCTAGC</u> GGCGGTGATCATGTTGTTGACG     |                                                                                    |
| 5UTR <i>divJ</i> -112_F     | gatt <u>GGATCC</u> TGCGAGATTCCGGTTCATCACG     |                                                                                    |
| 5UTR <i>divJ</i> +126_R2    | aact <u>GCTAGC</u> CAAGGATACGGCAGCGACGCG      |                                                                                    |
| 5UTR00888-235_F             | cgcg <u>GGATCC</u> ACAGCAACCTGAATGATCGTCGG    |                                                                                    |
| 5UTR00888+57_R              | atta <u>GCTAGC</u> GCTTGCTCCAGAATGATCCT       |                                                                                    |
| 5UTR <i>divK</i> -96_F      | atgc <u>GGATCC</u> AGCCTGGCGATCGACGAAATG      |                                                                                    |

|                                                                                                           |                                                 |  |
|-----------------------------------------------------------------------------------------------------------|-------------------------------------------------|--|
| 5UTR <divk+45_r2< td=""> <td><u>gcc</u><u>AGCTAGC</u> CATATTCAGCTCGTTATCCTC</td> <td></td> </divk+45_r2<> | <u>gcc</u> <u>AGCTAGC</u> CATATTCAGCTCGTTATCCTC |  |
| <i>gcr</i> ABSKOA_F2                                                                                      | AATTACTAGACGCATGCTAAGGACCTAGTCACCAAAAAGTATTAT   |  |
| <i>gcr</i> ABSKOA_R                                                                                       | TTAGCATGCGTCTAGTAATTGAATG                       |  |
| <i>gcr</i> AIRKOTTA_F2                                                                                    | AATTACTAGACGCATGCTTAGGACCTAGTCACCAAAAAGTATTAT   |  |
| <i>gcr</i> AIRKOTTA_R                                                                                     | TTAGCATGCGTCTAGTAATTGAATG                       |  |
| <i>dna</i> ABS5KOB_F                                                                                      | AGCAATCAGTCTCAGGAGTCTGGGGAAAAACACGACATGCGGCA    |  |
| <i>dna</i> ABS5KOB_R                                                                                      | AGACTCCTGAGACTGATTGCTTCCG                       |  |
| <i>dna</i> ABS4KOE_F                                                                                      | TGGAAGGCGGCAGAATGATTATGAATTTGGCGACGGCACC        |  |
| <i>dna</i> ABS4KOE_R                                                                                      | ATCATTCTGCCGCCTTCCAATTCATTATTCCGATGCCG          |  |
| <i>dna</i> ABS3KOA_F                                                                                      | ATAATGAAATTTGGAAATCAGCAAGATGCGGATGAATTTGGC      |  |
| <i>dna</i> ABS3KOA_R                                                                                      | GCTGATTTCCAATTCATTATTCCGAT                      |  |
| <i>dna</i> ABS3_4KOE_F                                                                                    | TTGGAAATCAGCAGAATGATTATGAATTTGGCGACGGCACC       |  |
| <i>dna</i> ABS3_4KOE_R                                                                                    | AATCATTCTGCTGATTCCAATTCATTATTCCGATGCCG          |  |
| <i>dna</i> ABSKO1-2_F                                                                                     | ATAATGAAATTTGGAAGGCCGGAAGATGCCGATGAATTTGGC      |  |
| <i>dna</i> ABSKO1-2_R                                                                                     | GGCATCTTCCGGCCTTCCAATTCATTATTCCGAT              |  |
| PCR 1                                                                                                     | CGGGCCTCTTCGCTATT                               |  |
| PCR 2                                                                                                     | TTAGCTCACTCATTAGG                               |  |
| <i>Egfp</i> -139_rev                                                                                      | GATGAACTTCAGGGTCAGCTTG                          |  |
| RT <i>ecpR1</i> +30_F                                                                                     | TTACCCCATGATGCTCAGGTC                           |  |
| RT <i>ecpR1</i> +131_R                                                                                    | GTCGACTGGTCCGGTTGCAG                            |  |
| RT5UTR <i>gcrA</i> -122_F                                                                                 | AATTACTAGACGCATGCGGC                            |  |
| RT5UTR <i>gcrA</i> +20_R                                                                                  | CGCTCGTCAGTCCAGTTCAT                            |  |
| RT <i>gcrA</i> +209_F                                                                                     | ACCGAACTACGCTGCGCGTT                            |  |
| RT <i>gcrA</i> +325_R                                                                                     | TGTCGATCTGCAGCTCCTGGT                           |  |
| RT5UTR <i>dnaA1</i> -432_F                                                                                | ATTCCACGTCGATCAATCAA                            |  |
| RT5UTR <i>dnaA1</i> -318_R                                                                                | GAGCCTCCTTCTCCTGCTCCA                           |  |
| RT5UTR <i>dnaA2</i> -248_F                                                                                | ACGGTTCCGGTCCGGCTTGAA                           |  |
| RT5UTR <i>dnaA2</i> -154_R                                                                                | CTGCGCTCATTTCGCTTGCT                            |  |
| RT <i>dnaA</i> +263_F                                                                                     | TGATCACCACGCTCGTCCAG                            |  |
| RT <i>dnaA</i> +374_R                                                                                     | CGGCAACGCTCTCTCAGGA                             |  |
| RT <i>tra</i> +308_F                                                                                      | CCACAAGGACGAGCTGGTGG                            |  |
| RT <i>tra</i> +400_R                                                                                      | GGTCTTGGCGTCCAGGTGA                             |  |
| RT <i>divJ</i> +388_F                                                                                     | GCGATGCGAGTGAGTATCTGA                           |  |
| RT <i>divJ</i> +511_R                                                                                     | GATGTCCACGGCAGAACGCT                            |  |
| RT5UTR00888-235_F                                                                                         | ACAGCAACCTGAATGATCGTCGG                         |  |
| RT5UTR00888+57_R                                                                                          | GCTTGCTCCAGAATGATCCT                            |  |
| RTSMc00888+493_F                                                                                          | TCTGCGTCAAGGACCGTAACC                           |  |
| RTSMc00888+654_R                                                                                          | CTCCAGGACGTGGCGATCCGA                           |  |
| RT <i>fisZ</i> _F                                                                                         | AACCAGAACCTCTTCCGCATCCG                         |  |
| RT <i>fisZ</i> _R                                                                                         | TCCTTGACCATGAGGTCCGT                            |  |
| RT <i>pleC</i> _F                                                                                         | TCTCATCGTGGCGATCTCACG                           |  |
| RT <i>pleC</i> _R                                                                                         | CCTCGGCGAAGAGTTCCGATC                           |  |
| RT <i>minD</i> _F                                                                                         | CCTCGCCGTCATCGTACCAAT                           |  |
| RT <i>minD</i> _R                                                                                         | TCAGCAGCAGGTGCTTCTCGA                           |  |
| RTSMc01852+244_F                                                                                          | TCACCAACACTGCCGACTGC                            |  |
| SMc01852+355down                                                                                          | TCGTGTGCAGGATGCTGATG                            |  |

Plasmids for sequencing

qRT-PCR studies

---

Small case indicates linker regions and restriction site sequences are underlined.
