# Supplementary material for: A Stress-Induced Small RNA Modulates Alpha-Rhizobial Cell Cycle Progression
Source: PLoS Genet. 2015 Apr 29;11(4):e1005153. doi: 10.1371/journal.pgen.1005153 (PMC4414408; doi:10.1371/journal.pgen.1005153)
Supplement: S8 Table — The M value represents the log2 ratio of transcript levels. Cell cycle related candidates are indicated in bold. (PDF) [file pgen.1005153.s008.pdf]

**S8 Table. Genes and 5'-/3'-UTRs displaying increased expression in 2011*ecpRI* versus Rm2011 wild type growing in MOPS medium (P-value  $\leq 0.05$  and M  $\geq 0.7$  or  $\leq -0.7$ ).**

| Gene ID                                       | Name               | Description                                         | M value     | Region     |
|-----------------------------------------------|--------------------|-----------------------------------------------------|-------------|------------|
| <i>Cellular processes and signaling (4)</i>   |                    |                                                     |             |            |
| SMc01187                                      | <i>rlpA</i>        | Putative rare lipoprotein A precursor               | 0.82        | CDS        |
| SMc04205                                      |                    | Putative iron/heme transport protein                | 0.77        | CDS        |
| <b>SMc02369</b>                               | <b><i>pleC</i></b> | <b>Sensor histidine kinase, DivK phosphatase</b>    | <b>0.75</b> | <b>CDS</b> |
| SMc00399                                      | <i>corA1</i>       | Probable magnesium and cobalt transport             | 0.72        | 5'UTR      |
| <i>Metabolism (8)</i>                         |                    |                                                     |             |            |
| SMc01875                                      | <i>lpxC</i>        | Probable N-acetylglucosamine deacetylase            | 0.97        | 5'UTR      |
| SMc00231                                      | <i>glmS</i>        | Glucosamine--fructose-6-phosphate                   | 0.90        | CDS        |
| SMc02124                                      | <i>cysI</i>        | Putative sulfite reductase                          | 0.88        | CDS        |
| SMc02093                                      | <i>lpxD</i>        | Probable glucosamine N-acyltransferase              | 0.83        | CDS        |
| SMc03179                                      | <i>phaA1</i>       | PH adaptation potassium efflux system transmembrane | 0.78        | CDS        |
| SMc02123                                      |                    | Sulfate or sulfite assimilation protein             | 0.75        | CDS        |
| SMB20151                                      |                    | Protein-tyrosine phosphatase                        | 0.77        | CDS        |
| SMc01880                                      | <i>panC</i>        | Probable pantoate--beta-alanine ligase              | 0.71        | CDS        |
| <i>Information storage and processing (4)</i> |                    |                                                     |             |            |
| SMc01294                                      | <i>rplF</i>        | Probable 50S ribosomal protein L6                   | 1.84        | CDS        |
| SMc02551                                      | <i>cysS</i>        | Probable cysteinyl-tRNA synthetase                  | 0.78        | 5'UTR      |
| SMc01268                                      | <i>lipB</i>        | Probable octanoyltransferase                        | 0.77        | CDS        |
| SMA1749                                       |                    | Putative transcriptional regulator                  | 0.75        | 5'UTR      |
| <i>Poorly characterized (11)</i>              |                    |                                                     |             |            |
| Sma1200                                       |                    | Conserved hypothetical protein                      | 0.94        | 5'UTR      |
| SMc02582                                      |                    | Conserved hypothetical protein                      | 0.82        | CDS        |
| SMA1608                                       |                    | Conserved hypothetical protein                      | 0.82        | 3'UTR      |
| SMA1803                                       |                    | TRm2011-2a transposase                              | 0.75        | CDS        |
| SMB21090                                      |                    | Conserved hypothetical membrane-anchored protein    | 0.75        | CDS        |
| SMc04178                                      |                    | Conserved hypothetical protein                      | 0.73        | CDS        |
| SMc01637                                      |                    | Conserved hypothetical protein                      | 0.72        | CDS        |
| SMc02221                                      |                    | Conserved hypothetical protein                      | 0.72        | CDS        |
| SMA1585                                       |                    | Hypothetical protein                                | 0.70        | CDS        |
| SMc02735                                      |                    | Hypothetical protein                                | 0.70        | CDS        |

The M value represents the log<sub>2</sub> ratio of transcript levels.

Cell cycle related candidates are indicated in bold and experimentally confirmed targets are underlined.
